# Supplementary material for: Leukemia-intrinsic determinants of CAR-T response revealed by iterative in vivo genome-wide CRISPR screening
Source: PubMed Central journal article supplement (PMC10698189; doi:10.1038/s41467-023-43790-2), 2023-12-05
Supplement: 41467_2023_43790_MOESM2_ESM.pdf [file 41467_2023_43790_MOESM2_ESM.pdf]

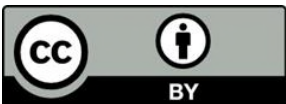

**Open Access** This file is licensed under a Creative Commons Attribution 4.0 International License, which permits use, sharing, adaptation, distribution and reproduction in any medium or format, as long as you give appropriate credit to the original author(s) and the source, provide a link to the Creative Commons license, and indicate if changes were made. In the cases where the authors are anonymous, such as is the case for the reports of anonymous peer reviewers, author attribution should be to 'Anonymous Referee' followed by a clear attribution to the source work. The images or other third party material in this file are included in the article's Creative Commons license, unless indicated otherwise in a credit line to the material. If material is not included in the article's Creative Commons license and your intended use is not permitted by statutory regulation or exceeds the permitted use, you will need to obtain permission directly from the copyright holder. To view a copy of this license, visit <http://creativecommons.org/licenses/by/4.0/>.

Editorial Note: This manuscript has been previously reviewed at another journal that is not operating a transparent peer review scheme. This document only contains reviewer comments and rebuttal letters for versions considered at Nature Communications.

## REVIEWERS' COMMENTS

Reviewer #1 (Remarks to the Author):

The authors additions and extended discussion are appreciated. My remaining concern would be the GL261 model.

In my opinion the inability to confirm these findings robustly in a second model is of concern. The authors reference new data regarding HLA-E in a pancreatic model. Whilst this aids further support to the concept of targeting this protein to enhance CAR T therapy, it of course does not support the concept that IFN $\gamma$  is overall immunosuppressive because there are obviously many of IFN $\gamma$ -responsive genes that modulate the response.

However, the authors discussion place these results into the overall context of the field and I do not believe this aspect alone should preclude publication of the results.

Minor point:

Patient samples- Thank you for clarifying the previous data. I believe this could be clarified further by more clearly stating that this was shown in a previous study. For example, in the following sentence by directly citing the study at this point "Importantly, this signature was not a general marker of more aggressive leukaemia, as it was (previously shown to be) not associated with resistance to conventional combination chemotherapy regimens (reference)".

Reviewer #3 (Remarks to the Author):

The authors have addressed the previous comments/concerns that I had with the manuscript and I have no further points to add.

The study represents a significant amount of work and although some of the findings are opposite to those previously obtained there is discussion regarding the potential reasons for this and it likely reflects the complexity of different model systems. It is important to publish this study for these reasons.

Anneliese Speak

## Response to Reviewers

Reviewer #1 (Remarks to the Author):

The authors additions and extended discussion are appreciated. My remaining concern would be the GL261 model.

In my opinion the inability to confirm these findings robustly in a second model is of concern. The authors reference new data regarding HLA-E in a pancreatic model. Whilst this aids further support to the concept of targeting this protein to enhance CAR T therapy, it of course does not support the concept that IFN $\gamma$  is overall immunosuppressive because there are obviously many of IFN $\gamma$ -responsive genes that modulate the response.

However, the authors discussion place these results into the overall context of the field and I do not believe this aspect alone should preclude publication of the results.

**We thank the reviewer for supporting publication of this work. We believe that the GL261 work supports the idea that IFN $\gamma$  promotes CAR-T resistance, but we strongly endeavor not overstate this result. Specifically, we make it clear that the impact of interferon gamma signaling is going to vary with tumor type and microenvironment (see highlighted paragraph in the discussion). Indeed, this is a central conclusion of this study.**

Minor point:

Patient samples- Thank you for clarifying the previous data. I believe this could be clarified further by more clearly stating that this was shown in a previous study. For example, in the following sentence by directly citing the study at this point "Importantly, this signature was not a general marker of more aggressive leukaemia, as it was (previously shown to be) not associated with resistance to conventional combination chemotherapy regimens (reference)".

**We now provide this comment reference at the suggested location in the manuscript (highlighted).**

Reviewer #3 (Remarks to the Author):

The authors have addressed the previous comments/concerns that I had with the manuscript and I have no further points to add.

The study represents a significant amount of work and although some of the findings are opposite to those previously obtained there is discussion regarding the potential reasons for this and it likely reflects the complexity of different model systems. It is important to publish this study for these reasons.

**We thank the reviewer for their supportive comments**
