# Supplementary material for: Leukemia-intrinsic determinants of CAR-T response revealed by iterative in vivo genome-wide CRISPR screening
Source: PubMed Central journal article supplement (PMC10698189; doi:10.1038/s41467-023-43790-2), 2023-12-05
Supplement: 41467_2023_43790_MOESM3_ESM.pdf [file 41467_2023_43790_MOESM3_ESM.pdf]

**Description of Additional Supplementary Information file**

**Supplementary Data 1** – Validation screen data

**Supplementary Data 2** – a) Genes comprising the 33 Sensitizer Signature described in main Figure 6a. b) Genes comprising the JAK/STAT/MHC-I 34 Signature described in 35 main figure 6b.

**Supplementary Data 3** - P values for indicated figures 38 and comparisons.
